# Supplementary material for: Characterization and staging of hepatic tuberculosis via computed tomography and imaging changes following anti-tuberculosis treatment
Source: Research Square preprint supplement (doi:10.21203/rs.3.rs-7090750/v1), 2025-10-14
Supplement: Supplementary file 1 [file 4fe35eaf7bae97066b177f3f.docx]

**Table 2.** Demographic information, clinical manifestations, and laboratory examination findings of patients with different computed tomography imaging subtypes of hepatic tuberculosis

|  | Total Patients（n=75） | Capsular type（n=40） | Parenchyma type（n=12） | Mixed type（n=23） | Statistical value | P value |
| --- | --- | --- | --- | --- | --- | --- |
| Age | 25.00 (21.00, 34.50) | 26.00 (20.75, 35.00) | 25.50 (21.75, 29.25) | 24.00 (22.00, 36.00) | 0.09 | 0.956 |
| Sex（Male） | 38 (50.67%) | 18 (45.00%) | 8 (66.67%) | 12 (52.17%) |  | 0.452 |
| EPTB | 54 (72.00%) | 30 (75.00%) | 10 (83.33%) | 14 (60.87%) |  | 0.342 |
| Fever | 26 (34.67%) | 10 (25.00%) | 6 (50.00%) | 10 (43.48%) | 3.68 | 0.158 |
| Weight loss | 17 (22.67%) | 6 (15.00%) | 5 (41.67%) | 6 (26.09%) | 3.97 | 0.138 |
| Abdominal pain | 46 (61.33%) | 24 (60.00%) | 7 (58.33%) | 15 (65.22%) | 0.22 | 0.895 |
| Vomiting | 20 (26.67%) | 7 (17.50%) | 5 (41.67%) | 8 (34.78%) | 3.87 | 0.144 |
| Cough | 31 (41.33%) | 14 (35.00%) | 6 (50.00%) | 11 (47.83%) | 1.43 | 0.488 |
| Abdominal tenderness | 27 (36.00%) | 14 (35.00%) | 6 (50.00%) | 7 (30.43%) | 1.35 | 0.510 |
| WBC | 5.04 (4.32, 6.62) | 5.09 (4.34, 6.82) | 5.10 (4.68, 7.34) | 4.89 (3.95, 6.20) | 2.19 | 0.335 |
| NEU | 3.30 (2.49, 4.33) | 3.34 (2.55, 4.07) | 3.54 (3.04, 5.06) | 2.94 (2.15, 4.12) | 2.55 | 0.279 |
| NEU% | 63.08±11.68 | 61.92±11.37 | 67.45±13.07 | 62.81± 11.46 | 1.05 | 0.357 |
| LYM | 1.24±0.50 | 1.32±0.50 | 1.14±0.39 | 1.17±0.54 | 0.99 | 0.375 |
| LYM% | 22.18 (16.92, 30.91) | 23.68 (18.10, 31.70) | 19.91 (14.54, 25.69) | 21.37 (16.33, 31.16) | 1.71 | 0.425 |
| MON | 0.46 (0.34, 0.61) | 0.45 (0.37, 0.58) | 0.57 (0.34, 0.72) | 0.46 (0.30, 0.60) | 0.86 | 0.652 |
| MON% | 8.75 (7.31, 10.46) | 8.77 (7.39, 9.98) | 8.87 (7.64, 10.93) | 8.75 (7.43, 11.03) | 0.69 | 0.709 |
| AST | 8 (10.67%) | 3 (7.50%) | 4 (33.33%) | 1 (4.35%) |  | 0.033 |
| ALT | 7 (9.33%) | 1 (2.50%) | 3 (25.00%) | 3 (13.04%) |  | 0.018 |
| TBi | 2 (2.67%) | 1 (2.50%) | 0 (0.00%) | 1 (4.35%) |  | 1.000 |
| DBi | 4 (5.33%) | 1 (2.50%) | 1 (8.33%) | 2 (8.70%) |  | 0.463 |
| TP | 33 (44.00%) | 18 (45.00%) | 5 (41.67%) | 10 (43.48%) | 0.05 | 0.978 |
| ALB | 49 (65.33%) | 27 (67.50%) | 8 (66.67%) | 14 (60.87%) |  | 0.897 |
| GLOB | 10 (13.33%) | 5 (12.50%) | 2 (16.67%) | 3 (13.04%) |  | 0.914 |
| ALP | 10 (13.33%) | 1 (2.50%) | 5 (41.67%) | 4 (17.39%) |  | 0.002 |
| GGT | 21 (28.00%) | 5 (12.50%) | 7 (58.33%) | 9 (39.13%) | 11.66 | 0.003 |

EPTB: Extrapulmonary tuberculosis except hepatic tuberculosis; WBC: Peripheral blood white blood cell count (Unit: ×109/L); NEU: Peripheral blood neutrophil count (Unit: ×109/L); NEU%: Peripheral blood neutrophil percentage (%); LYM: Peripheral blood lymphocyte count (Unit: ×109/L); LYM%: Peripheral blood lymphocyte percentage (%); MON: Peripheral blood monocyte count (Unit: ×109/L); MON%: Peripheral blood monocyte percentage (%); AST: Elevated aspartate transaminase

ALT: Elevated alanine transaminase; TBi: Elevated total bilirubin; DBi: Elevated direct bilirubin; TP: Decreased total serum protein; ALB: Decreased serum albumin; GLOB: Elevated serum globulin; ALP: Elevated alkaline phosphatase; GGT: Elevated γ-glutamyl transferase
