# Supplementary material for: Characterization and staging of hepatic tuberculosis via computed tomography and imaging changes following anti-tuberculosis treatment
Source: Research Square preprint supplement (doi:10.21203/rs.3.rs-7090750/v1), 2025-10-14
Supplement: Supplementary file 2 [file 62989de2ac0c250a477d7263.docx]

Table 3. Demographic information, computed tomography imaging subtypes, and laboratory examination findings in patients who showed improvement and paradoxical reactions to anti-tuberculosis treatment

|  | Total Patients（n=40） | Improve group（n=24） | PR group（n=16） | Statistical value | P value |
| --- | --- | --- | --- | --- | --- |
| Sex（male） | 20 (50.00%) | 13 (54.17%) | 7 (43.75%) | 0.10 | 0.747 |
| Age | 23.00 (19.75, 30.75) | 24.50 (19.00, 30.00) | 23.00 (21.00, 32.00) | 0.208 | 0.846 |
| CT subtype |  |  |  |  | 0.337 |
| Capsular type | 20 (50.00%) | 10 (41.67%) | 10 (62.50%) |  |  |
| Parenchyma type | 6 (15.00%) | 5 (20.83%) | 1 (6.25%) |  |  |
| Mixed type | 14 (35.00%) | 9 (37.50%) | 5 (31.25%) |  |  |
| WBC | 5.42 (4.54, 6.92) | 5.72 (5.01, 7.54) | 5.07 (3.95, 6.04) | -1.657 | 0.100 |
| NEU | 3.60 (2.74, 4.69) | 3.94 (2.88, 5.67) | 3.40 (2.62, 3.94) | -1.629 | 0.107 |
| NEU% | 66.51±11.27 | 68.02±11.85 | 64.26±10.30 | 1.034 | 0.308 |
| LYM% | 21.36±9.97 | 20.60±11.21 | 22.50±7.95 | -0.586 | 0.561 |
| LYM | 1.18±0.47 | 1.19±0.49 | 1.17±0.45 | 0.174 | 0.862 |
| MON | 0.51 (0.38, 0.64) | 0.52 (0.38, 0.61) | 0.47 (0.39, 0.67) | -0.110 | 0.924 |
| MON% | 9.14±2.73 | 8.68±2.76 | 9.84±2.63 | -1.330 | 0.191 |
| ESR | 20.50 (5.75, 36.20) | 20.00 (5.75, 51.50) | 21.00 (8.75, 31.00) | -0.401 | 0.699 |
| ALT | 11.00 (9.00, 23.75) | 11.00 (9.00, 37.00) | 11.35 (8.50, 20.25) | -0.402 | 0.698 |
| AST | 18.00 (14.75, 26.75) | 19.00 (14.00, 29.50) | 18.00 (15.00, 24.50) | 0.055 | 0.967 |
| TP | 66.73±7.97 | 65.93±8.96 | 67.93±6.27 | 0.663 | 0.521 |
| ALB | 34.35±6.93 | 32.90±7.76 | 36.51±4.93 | -1.645 | 0.108 |
| GLOB | 32.39±7.69 | 33.03±8.36 | 31.43±6.69 | 0.640 | 0.526 |
| PAB | 141.78±50.02 | 137.99±57.13 | 147.46±37.98 | -0.582 | 0.564 |
| CD3 | 923.83±325.13 | 951.79±363.70 | 881.88±262.48 | 0.661 | 0.512 |
| CD4 | 525.93±216.17 | 549.63±239.52 | 490.38±176.87 | 0.846 | 0.403 |
| CD8 | 297.00 (259.25, 433.00) | 290.00 (258.25, 437.50) | 337.00 (277.25, 413.50) | 0.332 | 0.750 |

CT: computed tomography; WBC: Peripheral blood white blood cell count (Unit: ×109/L); NEU: Peripheral blood neutrophil count (Unit: ×109/L); NEU%: Peripheral blood neutrophil percentage (%); LYM: Peripheral blood lymphocyte count (Unit: ×109/L); LYM%: peripheral blood lymphocyte percentage (%); MON: peripheral blood monocyte count (Unit: ×109/L); MON%:peripheral blood monocyte percentage (%); ESR: Erythrocyte sedimentation rate (Unit: mm/H); ALT: Alanine transaminase (Unit: U/L); AST: Aspartate transaminase (Unit: U/L); TP: Total protein (Unit: g/L); ALB: Albumin (Unit: g/L); GLOB: Globulin (Unit: g/L); PAB: Prealbumin (Unit: mg/L); CD3: CD3-positive T lymphocytes (Unit: cells/uL); CD4: CD4-positive T lymphocytes (Unit: cells/uL); CD8: CD8-positive T lymphocytes (Unit: cells/uL)
