# Supplementary material for: Characterization and staging of hepatic tuberculosis via computed tomography and imaging changes following anti-tuberculosis treatment
Source: Research Square preprint supplement (doi:10.21203/rs.3.rs-7090750/v1), 2025-10-14
Supplement: Supplementary file 3 [file a7f279b4e790ac8f55b81084.docx]

Table 1. Normal ranges of indicators for whole blood and serum tests

|  | Normal Value Range | Unit | Specimen |
| --- | --- | --- | --- |
| WBC | 3.5~9.5 | 109/L | whole blood |
| NEU | 1.8~6.3 | 109/L | whole blood |
| NEU% | 40~75 | % | whole blood |
| LYM | 1.1~3.2 | 109/L | whole blood |
| LYM% | 20~50 | % | whole blood |
| MON | 0.1~0.6 | 109/L | whole blood |
| MON% | 3~10 | % | whole blood |
| ESR | 0~20 | mm/H | whole blood |
| AST | 5~40 | U/L | serum |
| ALT | 5~40 | U/L | serum |
| TBi | 3.42~20.5 | mmol/L | serum |
| DBi | ＜6.8 | mmol/L | serum |
| TP | 60~83 | U/L | serum |
| ALB | 34~54 | U/L | serum |
| GLOB | 20~30 | g/L | serum |
| ALP | 45~125 | U/L | serum |
| GGT | ＜50 | U/L | serum |
| CD3 | 955~2860 | cell/uL | whole blood |
| CD4 | 550~1440 | cell/uL | whole blood |
| CD8 | 320~1250 | cell/uL | whole blood |

WBC: Peripheral blood white blood cell count (Unit: ×109/L); NEU: Peripheral blood neutrophil count (Unit: ×109/L); NEU%: Peripheral blood neutrophil percentage (%); LYM: Peripheral blood lymphocyte count (Unit: ×109/L); LYM%: Peripheral blood lymphocyte percentage (%); MON: Peripheral blood monocyte count (Unit: ×109/L); MON%: Peripheral blood monocyte percentage (%); AST: Aspartate transaminase ; ALT: Alanine transaminase; TBi: Total bilirubin; DBi: Direct bilirubin; TP: Total protein; ALB: Albumin; GLOB: Globulin; ALP: Alkaline phosphatase; GGT: γ-Glutamyl transferase; CD3: CD3-positive T lymphocytes (Unit: cells/uL); CD4: CD4-positive T lymphocytes (Unit: cells/uL); CD8: CD8-positive T lymphocytes (Unit: cells/uL)
